# Supplementary material for: Atomically precise structures of Pt2(S-Adam)4(PPh3)2 complexes and catalytic application in propane dehydrogenation
Source: Royal Society of Chemistry journal article supplement (doi:10.1039/d1nr07286b), 2022-01-01
Supplement: d1nr07286b1.pdf [file d1nr07286b1.pdf]

## Supplementary Information

### Atomically Precise Structure of $\text{Pt}_2(\text{S-Adam})_4(\text{PPh}_3)_2$ Complexes and Catalytic Application in Propane Dehydrogenation

Xinzhang Lin,<sup>ab‡</sup> Junying Zhang,<sup>a‡</sup> Jie Tang,<sup>ab</sup> Yang Yang,<sup>ab</sup> Chao Liu,<sup>\*a</sup> and Jiahui Huang <sup>\*a</sup>

<sup>a</sup> Dalian National Laboratory for Clean Energy, Dalian Institute of Chemical Physics,  
Chinese Academy of Sciences, Dalian 116023, China

<sup>b</sup> University of Chinese Academy of Sciences, Beijing 100049, China

<sup>‡</sup> These authors contributed equally

\* Corresponding to: chaoliu@dicp.ac.cn; jiahuihuang@dicp.ac.cn

## 1. Figures

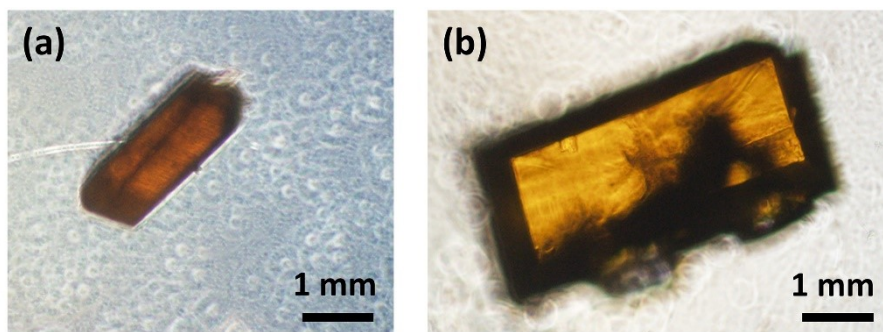

**Figure S1.** The photos of Pt<sub>2</sub>-A crystals (a) and Pt<sub>2</sub>-B crystals (b) taken by optical electron microscopy.

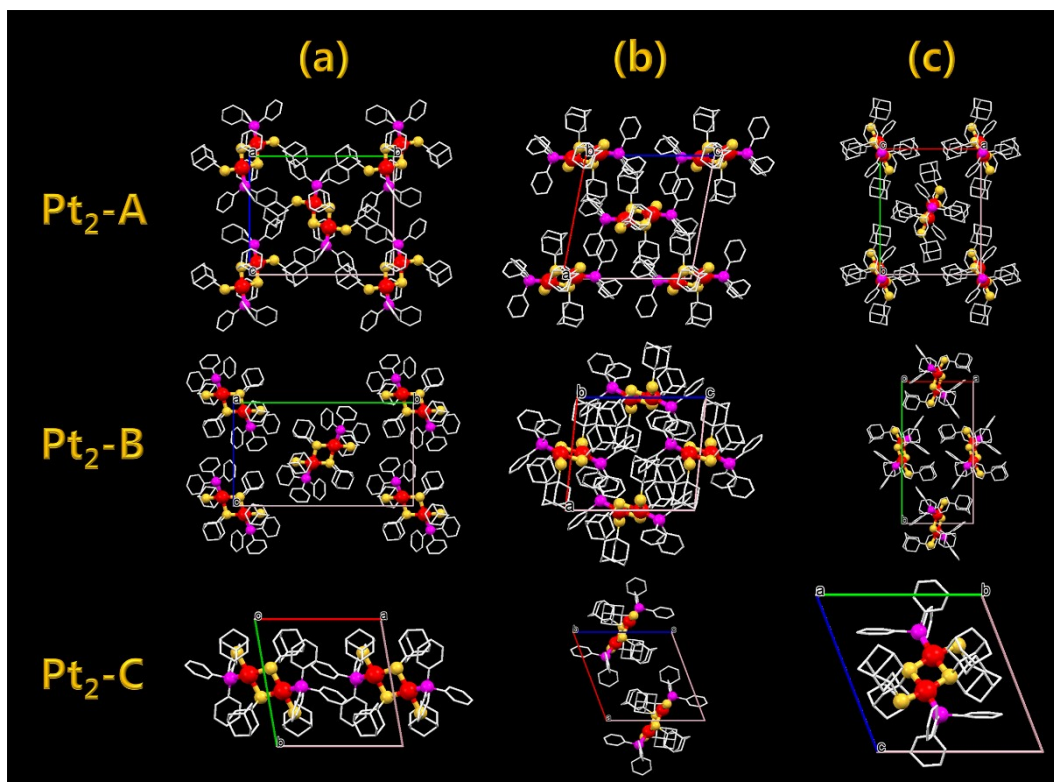

**Figure S2.** (a-c) Packing of  $\text{Pt}_2$  complexes isomers from a, b, c directions in a unit cell, respectively. Color legend: Pt, red; S, yellow; P, purple; C, light grey. Hydrogen atoms are omitted for clarity.

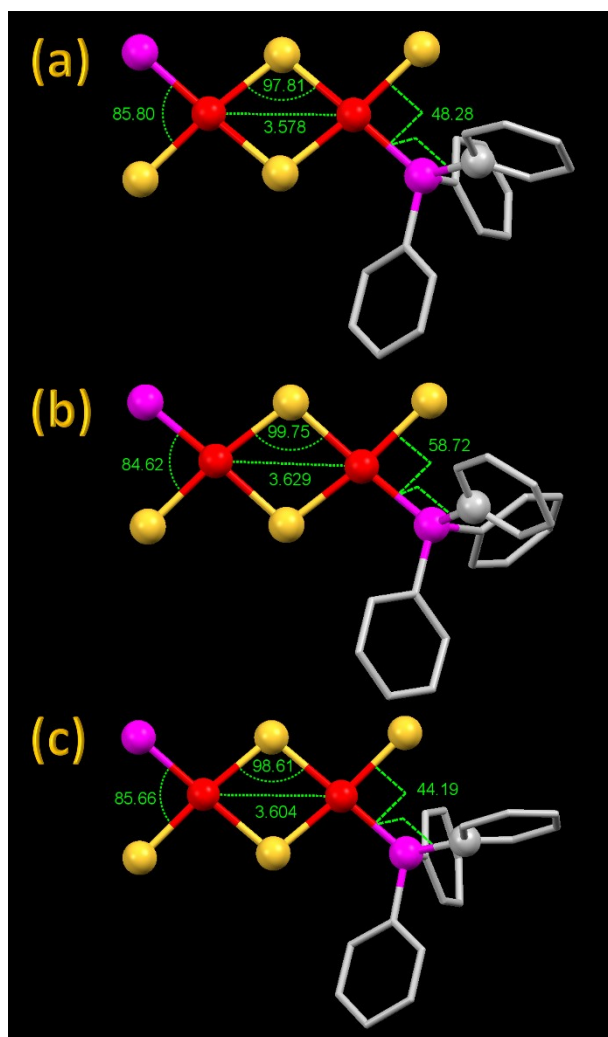

**Figure S3.** (a-c) Comparative analysis of structural angles and lengths for Pt<sub>2</sub> complexes isomers. The unit of distances is Å and the unit of angles is °. Color legend: Pt, red; S, yellow; P, purple; C, light grey.

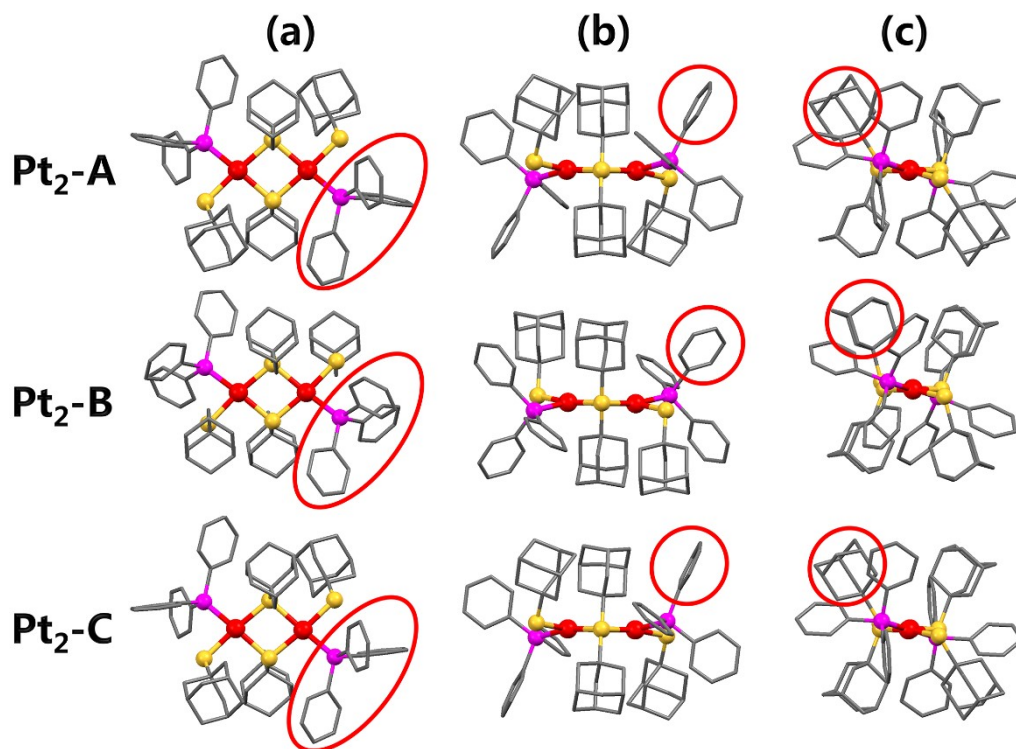

**Figure S4.** Total structures of  $\text{Pt}_2$  complexes from (a) top view, (b) front view, and (c) side view, respectively. Color legend: Pt, red; S, yellow; P, purple; C, grey. Hydrogen atoms are omitted for clarity.

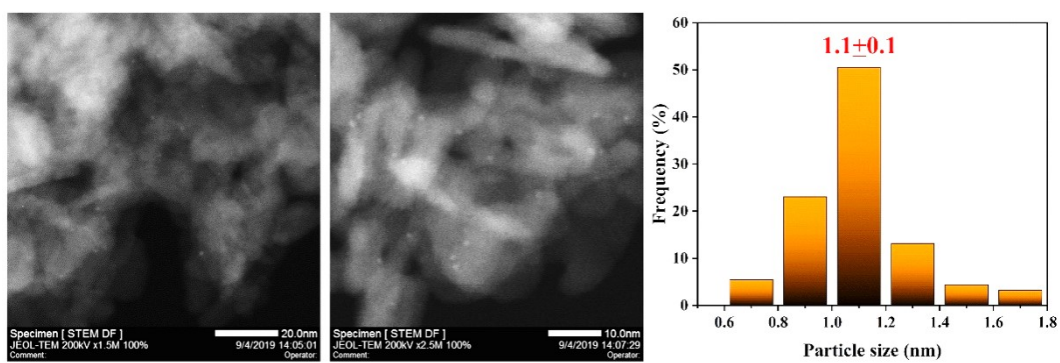

Figure S5. STEM images of Pt<sub>2</sub>/γ-Al<sub>2</sub>O<sub>3</sub>-600-N<sub>2</sub>.

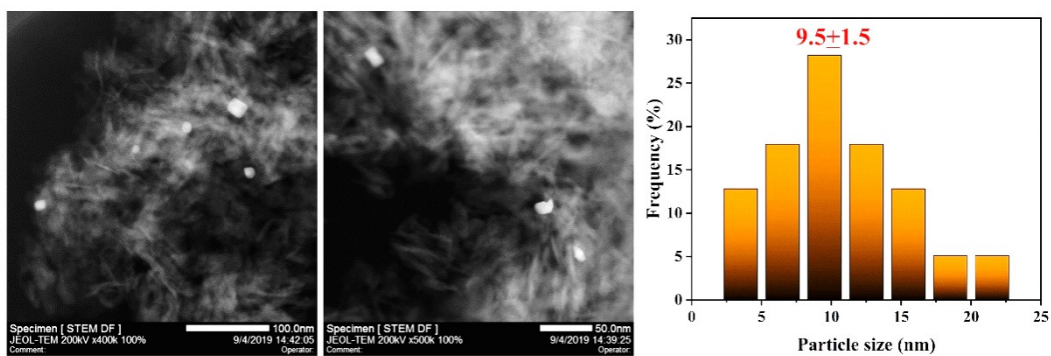

Figure S6. STEM images of Pt<sub>2</sub>/γ-Al<sub>2</sub>O<sub>3</sub>-600-O<sub>2</sub>.

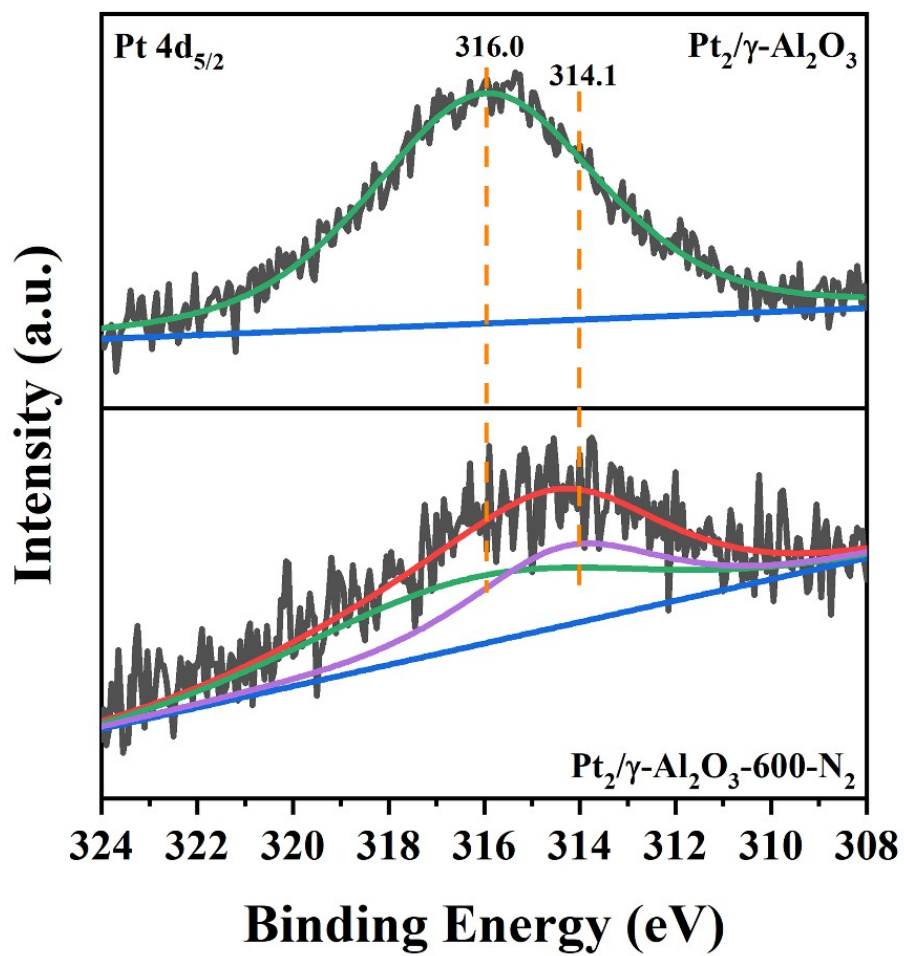

Figure S7. Pt 4d<sub>5/2</sub> XPS spectra of Pt<sub>2</sub>/γ-Al<sub>2</sub>O<sub>3</sub> and Pt<sub>2</sub>/γ-Al<sub>2</sub>O<sub>3</sub>-600-N<sub>2</sub>.



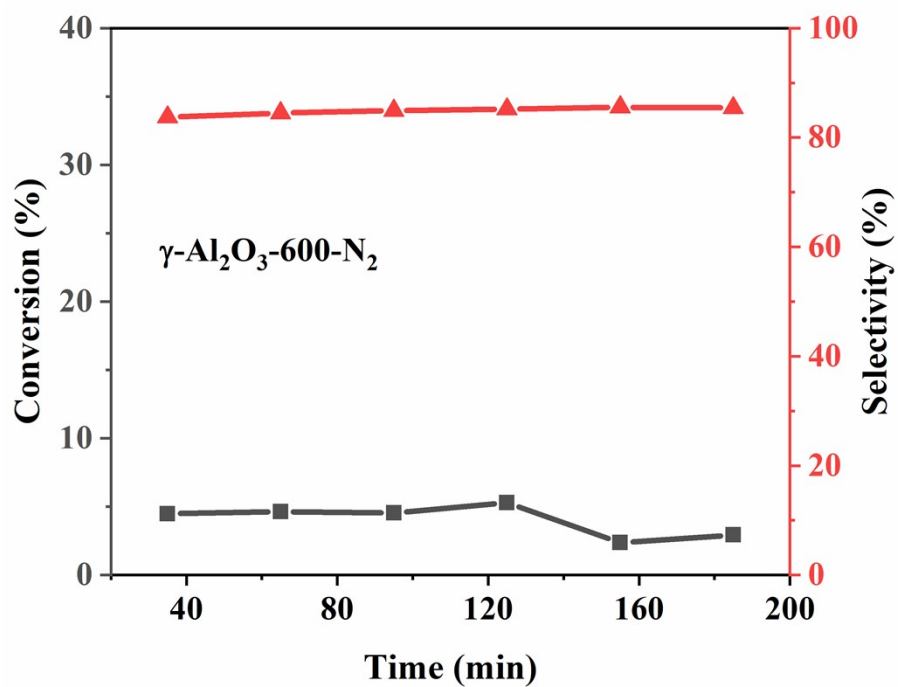

**Figure S8.** The catalytic performance of  $\gamma\text{-Al}_2\text{O}_3\text{-600-N}_2$  in propane dehydrogenation.

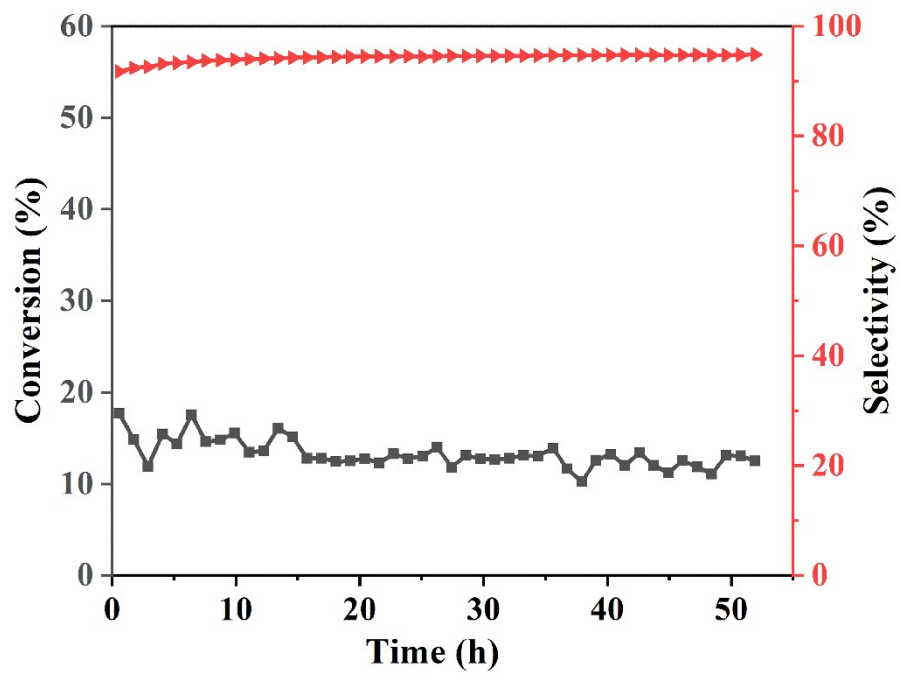

**Figure S9.** The catalytic stability of Pt<sub>2</sub>/γ-Al<sub>2</sub>O<sub>3</sub>-600-N<sub>2</sub> in propane dehydrogenation.

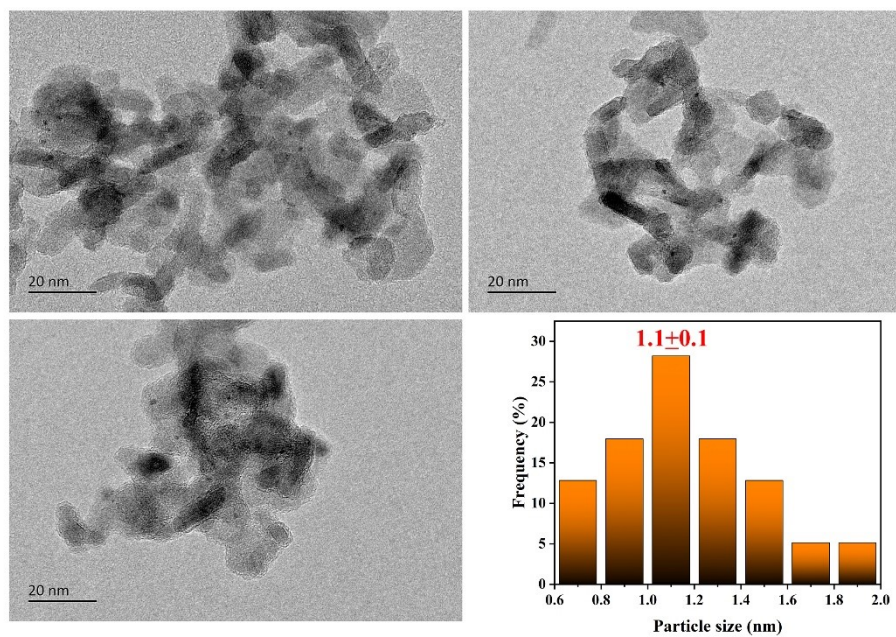

**Figure S10.** The HRTEM images of the spent Pt<sub>2</sub>/ $\gamma$ -Al<sub>2</sub>O<sub>3</sub>-600-N<sub>2</sub> catalyst after catalytic propane dehydrogenation for 50 h.

## 2. Tables

**Table S1.** Crystal data and structure refinement for three Pt<sub>2</sub> complexes (A, B and C).

|                                 | <b>A</b>                                                                                          | <b>B</b>                                                                                          | <b>C</b>                                                                                          |
|---------------------------------|---------------------------------------------------------------------------------------------------|---------------------------------------------------------------------------------------------------|---------------------------------------------------------------------------------------------------|
| Compound                        | Pt <sub>2</sub> (PPh <sub>3</sub> ) <sub>2</sub> (SC <sub>10</sub> H <sub>15</sub> ) <sub>4</sub> | Pt <sub>2</sub> (PPh <sub>3</sub> ) <sub>2</sub> (SC <sub>10</sub> H <sub>15</sub> ) <sub>4</sub> | Pt <sub>2</sub> (PPh <sub>3</sub> ) <sub>2</sub> (SC <sub>10</sub> H <sub>15</sub> ) <sub>4</sub> |
| Empirical formula               | C76 H90 P2 Pt2 S4'                                                                                | C76 H90 P2 Pt2 S4'                                                                                | C76 H90 P2 Pt2 S4'                                                                                |
| Formula weight                  | 1583.83                                                                                           | 1583.83                                                                                           | 1583.83                                                                                           |
| Crystal system                  | monoclinic                                                                                        | monoclinic                                                                                        | triclinic                                                                                         |
| Temperature (K)                 | 100                                                                                               | 293                                                                                               | 293                                                                                               |
| Radiation                       | type, synchrotron radiation,                                                                      | 0.71073                                                                                           | 0.71073                                                                                           |
| wavelength (Å)                  | 0.6229                                                                                            |                                                                                                   |                                                                                                   |
| Space group                     | P 21/n                                                                                            | P 21/n                                                                                            | P -1                                                                                              |
| a, b, c (Å)                     | 14.310(3),<br>17.506(4),<br>14.665(3)                                                             | 11.7531(5),<br>23.1655(12),<br>13.3165(7)                                                         | 13.016(2),<br>13.366(3),<br>14.337(2)                                                             |
| α, β, γ (°)                     | 90,<br>100.92(3),<br>90                                                                           | 90,<br>95.940(5),<br>90                                                                           | 62.656(18),<br>63.186(19),<br>69.974(17)                                                          |
| V (Å <sup>3</sup> )             | 3607.2(13)                                                                                        | 3606.2(3)                                                                                         | 1948.3(7)                                                                                         |
| Z                               | 2                                                                                                 | 2                                                                                                 | 1                                                                                                 |
| Density (mg /m <sup>3</sup> )   | 1.458                                                                                             | 1.231                                                                                             | 1.350                                                                                             |
| Crystal size (mm <sup>3</sup> ) | 2.2*0.8*0.6                                                                                       | 3.1*1.5*0.2                                                                                       | 1.2*0.7*0.3                                                                                       |
| Absorption coefficient          | 4.074                                                                                             | 4.227                                                                                             | 3.771                                                                                             |
| F(000)                          | 1592                                                                                              | 1760                                                                                              | 796                                                                                               |
| Theta range for data collection | 2.05 to 27.56                                                                                     | 2.818 to 29.815                                                                                   | 3.377 to 22.389                                                                                   |
| Index ranges                    | -19<=h<=0,<br>23<=k<=23,<br>18<=l<=19                                                             | - 14<=h<=15,<br>- 25<=k<=32,<br>17<=l<=18                                                         | - 15<=h<=15,<br>- 15<=k<=14,<br>17<=l<=15                                                         |

|                         |             |             |             |
|-------------------------|-------------|-------------|-------------|
| Reflections collected   | 9340        | 8797        | 6837        |
| Independent reflections | 8800        | 7056        | 3874        |
| Goodness-of-fit on F2   | 1.025       | 1.091       | 0.938       |
| Final R indices         | R1=0.0288,  | R1=0.0312,  | R1=0.0911,  |
| [I>2sigma(I)]           | wR2= 0.0761 | wR2= 0.0624 | wR2= 0.2075 |
| R indices (all data)    | R1= 0.0303, | R1=0.0486,  | R1= 0.1450, |
|                         | wR2= 0.0776 | wR2= 0.0707 | wR2= 0.2333 |

---

**Table S2.** Crystal data comparison of three Pt<sub>2</sub> complexes isomers (A, B and C)

|                     | <b>A</b>                              | <b>B</b>                                  | <b>C</b>                                 |
|---------------------|---------------------------------------|-------------------------------------------|------------------------------------------|
| Formula             | C76 H90 P2 Pt2 S4                     | C76 H90 P2 Pt2 S4                         | C76 H90 P2 Pt2 S4                        |
| Crystal system      | monoclinic                            | monoclinic                                | triclinic                                |
| Space group         | P 21/n                                | P 21/n                                    | P -1                                     |
| a, b, c (Å)         | 14.310(3),<br>17.506(4),<br>14.665(3) | 11.7531(5),<br>23.1655(12),<br>13.3165(7) | 13.016(2),<br>13.366(3),<br>14.337(2)    |
| α, β, γ (°)         | 90,<br>100.92(3),<br>90               | 90,<br>95.940(5),<br>90                   | 62.656(18),<br>63.186(19),<br>69.974(17) |
| V (Å <sup>3</sup> ) | 3607.2(13)                            | 3606.2(3)                                 | 1948.3(7)                                |

**Table S3.** Structural analysis of three Pt<sub>2</sub> complexes isomers (A, B and C)

|                        | <b>A</b>               | <b>B</b>           | <b>C</b>           |
|------------------------|------------------------|--------------------|--------------------|
| Pt--Pt distance<br>(Å) | 3.578                  | 3.629              | 3.604              |
| Pt-S lengths<br>(Å)    | 2.3639 (2.3442-2.3789) | 2.365(2.349-2.378) | 2.369(2.351-2.391) |
| Pt-P lengths           | 2.2707                 | 2.2868             | 2.273              |
| Pt-S-Pt angles<br>(°)  | 97.81                  | 99.75              | 98.60              |
